# Supplementary material for: A combined experimental and computational study on the adsorption and reactions of NO on rutile TiO2
Source: Royal Society of Chemistry journal article supplement (doi:10.1039/c2cp42653f), 2012-10-25
Supplement: c2cp42653f.pdf [file c2cp42653f.pdf]

# A combined experimental and computational study on the adsorption and reactions of NO on rutile TiO<sub>2</sub>

Dorothee Stodt<sup>\*a</sup>, Heshmat Noei,<sup>\*b</sup>  
Christof Hättig,<sup>a</sup> and Yuemin Wang,<sup>b</sup>

<sup>a</sup>*Lehrstuhl für Theoretische Chemie, Ruhr-Universität Bochum,  
44781 Bochum, Germany*

<sup>b</sup>*Lehrstuhl für Technische Chemie, Ruhr-Universität Bochum,  
44801 Bochum, Germany*

This supplementary information contains the geometry optimized coordinates and the absolute energies (SVP and TZVPP) in au of the calculated N<sub>x</sub>O<sub>y</sub> structures

Cluster

| Atom | x               | y               | z               |
|------|-----------------|-----------------|-----------------|
| O    | -6.172203002750 | -0.004052241899 | 9.972259949149  |
| O    | -6.009743408145 | 0.000823061800  | 14.776537039486 |
| O    | 0.004981774163  | -5.668095120075 | 8.583508868893  |
| O    | 0.000354230343  | -0.002160887709 | 3.505944664751  |
| O    | -0.024159614553 | 0.000971495396  | 8.628051260035  |
| O    | 6.116639690595  | 0.019594647569  | 9.965302632180  |
| O    | 5.954881316573  | 0.004666289774  | 14.777319373595 |
| O    | 0.016604767911  | 5.667766910152  | 8.582720492983  |
| TI   | -6.419343473729 | -2.811878616207 | 12.886116344466 |
| TI   | -6.415813433045 | 2.817365475751  | 12.884462727246 |
| TI   | -6.120193134587 | 0.010333296293  | 6.631293672854  |
| TI   | 0.031748631439  | -5.522343341514 | 12.111619233042 |
| TI   | -0.005173809252 | -2.801129063956 | 6.187099102597  |
| TI   | -0.178048930087 | 0.017603904792  | 12.119511431457 |
| TI   | 0.022992323554  | 2.810265944685  | 6.195756672874  |
| TI   | 6.415321754431  | 2.808584778150  | 12.882176340386 |
| TI   | 6.136697938362  | -0.009854005955 | 6.631715860785  |
| TI   | 0.087830761641  | 5.516910456753  | 12.120905808646 |
| O    | -3.631103897400 | -2.698241689503 | 6.252805509168  |
| O    | -9.950989540273 | -2.682392810606 | 12.718566990880 |
| O    | -2.304530156377 | -2.828576556897 | 12.597715200709 |
| O    | -3.642535344674 | 2.695349105434  | 6.256440590284  |
| O    | -9.949496294939 | 2.681528210413  | 12.714893779596 |
| O    | -2.305720817706 | 2.823954270909  | 12.591923157777 |
| O    | 3.633439261786  | -2.691380294035 | 6.254220694638  |
| O    | 2.256312683689  | -2.862758168307 | 12.613559025841 |
| O    | 9.889585775546  | -2.646663600292 | 12.657537664477 |
| O    | 3.623200230391  | 2.695814362248  | 6.241623902130  |
| O    | 2.259270621954  | 2.854746212294  | 12.612731705777 |
| O    | 9.934587770304  | 2.699891472941  | 12.716894709563 |

SCF-energies:

SVP -50236.67280920

TZVPP -50248.41314117

NO( $N_{ad}$ )

| Atom | x               | y               | z               |
|------|-----------------|-----------------|-----------------|
| O    | -6.184108859283 | -0.000891955663 | 9.976865798599  |
| O    | -5.973681021978 | 0.001289069197  | 14.772256973558 |
| O    | 0.009966739297  | -5.671022065500 | 8.577786685757  |
| O    | 0.001109958397  | -0.002448781394 | 3.516512031123  |
| O    | -0.017011416262 | 0.006243564630  | 8.630340843550  |
| O    | 6.127754327875  | 0.019836868444  | 9.973476490832  |
| O    | 5.912981944470  | 0.009766430937  | 14.781508553553 |
| O    | 0.018683658171  | 5.666757268650  | 8.574086055728  |
| TI   | -6.421836891361 | -2.814656258825 | 12.873022805229 |
| TI   | -6.420613016657 | 2.818870972163  | 12.869512197549 |
| TI   | -6.108955720893 | 0.011495463153  | 6.626423602311  |
| TI   | 0.048690284112  | -5.531809003025 | 12.089502574058 |
| TI   | -0.003925702111 | -2.771139779779 | 6.225145359832  |
| TI   | -0.220559023522 | 0.012253798668  | 12.271145541466 |
| TI   | 0.028212218452  | 2.776652409478  | 6.223438572144  |
| TI   | 6.412111847361  | 2.809032232818  | 12.866674645989 |
| TI   | 6.128922821017  | -0.010879298750 | 6.630880134860  |
| TI   | 0.104424205053  | 5.526927269989  | 12.091453375646 |
| O    | -3.641938322120 | -2.701386039196 | 6.261046679119  |
| O    | -9.951530892576 | -2.680775678387 | 12.728013961123 |
| O    | -2.318341684488 | -2.851670548527 | 12.571194586930 |
| O    | -3.655626629884 | 2.698881387369  | 6.260932869571  |
| O    | -9.950821625913 | 2.680905000861  | 12.726233934706 |
| O    | -2.312500870921 | 2.844620188375  | 12.600792453875 |
| O    | 3.647942014484  | -2.694617544916 | 6.259691552120  |
| O    | 2.264113891662  | -2.894150289349 | 12.603347334764 |
| O    | 9.888903522569  | -2.645078367330 | 12.671471549999 |
| O    | 3.638795523380  | 2.700575735679  | 6.244444853687  |
| O    | 2.266425743452  | 2.889593711787  | 12.609689653582 |
| O    | 9.932816302531  | 2.698451180773  | 12.725170241283 |
| N    | 0.012355827447  | -0.127907062075 | 16.910452384561 |
| O    | 0.191520330556  | 1.420016648580  | 18.376247990698 |

SCF-energies:

SVP -50366.43088903

TZVPP -50378.32275955

NO(O<sub>ad</sub>)

| Atom | x               | y               | z               |
|------|-----------------|-----------------|-----------------|
| O    | -6.181066438017 | -0.002262275794 | 9.975144327923  |
| O    | -5.987364205648 | 0.002639210577  | 14.771921321518 |
| O    | 0.008496365688  | -5.670749543381 | 8.578438905913  |
| O    | 0.000724663092  | -0.002245580914 | 3.515173972940  |
| O    | -0.021828448999 | 0.004214875129  | 8.638259376153  |
| O    | 6.125446798725  | 0.020584272503  | 9.971359350967  |
| O    | 5.928435856252  | 0.009360904510  | 14.780174493877 |
| O    | 0.018330725088  | 5.667713120855  | 8.575613884871  |
| TI   | -6.421092739100 | -2.813759900039 | 12.875918834116 |
| TI   | -6.419463393826 | 2.819173928897  | 12.870334577308 |
| TI   | -6.111721022455 | 0.013137071061  | 6.626964971385  |
| TI   | 0.046158870970  | -5.528979643259 | 12.094562111671 |
| TI   | -0.007317763958 | -2.779281950022 | 6.214145218671  |
| TI   | -0.210207874898 | 0.011950711543  | 12.228315596201 |
| TI   | 0.029269762636  | 2.786657847540  | 6.216927989172  |
| TI   | 6.413362397514  | 2.809014124104  | 12.868726350529 |
| TI   | 6.130734978032  | -0.012764977573 | 6.631053408528  |
| TI   | 0.100326391050  | 5.523218192248  | 12.100023147558 |
| O    | -3.638062124537 | -2.700599272269 | 6.258398285037  |
| O    | -9.951591880667 | -2.681461499256 | 12.725637909436 |
| O    | -2.313958426047 | -2.846367786088 | 12.576850365424 |
| O    | -3.653469838278 | 2.697393296269  | 6.260243356236  |
| O    | -9.950936972257 | 2.681623452986  | 12.722191454124 |
| O    | -2.310727725028 | 2.840927179376  | 12.595280312667 |
| O    | 3.644729490949  | -2.692758180456 | 6.259738063932  |
| O    | 2.263575094256  | -2.887467129064 | 12.601432714524 |
| O    | 9.889601017113  | -2.645988866817 | 12.667725050264 |
| O    | 3.632861276056  | 2.698908157269  | 6.244732006592  |
| O    | 2.265376723820  | 2.881567352168  | 12.611401228972 |
| O    | 9.933967724523  | 2.699240090894  | 12.722598517575 |
| N    | 0.119317738807  | 1.504491446017  | 18.374106357574 |
| O    | -0.013735895607 | -0.104091406165 | 16.930089045112 |

SCF-energies:

SVP -50366.42432666

TZVPP -50378.31553368

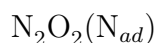

| Atom | x               | y               | z               |
|------|-----------------|-----------------|-----------------|
| O    | -6.189273082033 | -0.005952185551 | 9.987153054345  |
| O    | -5.969142564806 | -0.001636331514 | 14.777180000480 |
| O    | 0.008424339251  | -5.668064534660 | 8.574857980598  |
| O    | 0.001464619643  | -0.002398733877 | 3.519591237590  |
| O    | -0.008633483296 | 0.000412886987  | 8.597136305563  |
| O    | 6.136588252582  | 0.013359703867  | 9.982929597955  |
| O    | 5.905668672492  | 0.007830355762  | 14.788261477251 |
| O    | 0.017059241096  | 5.668067346114  | 8.575472579252  |
| TI   | -6.423289306206 | -2.809805231112 | 12.862522203918 |
| TI   | -6.414510539342 | 2.819406443041  | 12.863542400579 |
| TI   | -6.098183865823 | 0.009360769103  | 6.624351705242  |
| TI   | 0.040785705219  | -5.532895821613 | 12.065108335493 |
| TI   | 0.000817017968  | -2.734437841288 | 6.233965084334  |
| TI   | -0.206718406997 | 0.004608263275  | 12.405664430004 |
| TI   | 0.029266791748  | 2.764025945517  | 6.259094986362  |
| TI   | 6.407581327114  | 2.810144024821  | 12.860176425779 |
| TI   | 6.121911093954  | -0.009285368814 | 6.631046456793  |
| TI   | 0.097370650254  | 5.519399603116  | 12.094873379086 |
| O    | -3.658979851427 | -2.705311256601 | 6.265274784950  |
| O    | -9.954578230022 | -2.683805359335 | 12.736450448501 |
| O    | -2.317270545702 | -2.870015886740 | 12.601970970130 |
| O    | -3.668307511601 | 2.701070111303  | 6.269559536912  |
| O    | -9.951151032113 | 2.679804765705  | 12.730970634729 |
| O    | -2.315863469280 | 2.853165067886  | 12.591058873627 |
| O    | 3.663899298577  | -2.701282586688 | 6.262675463663  |
| O    | 2.269952772016  | -2.906655220304 | 12.615018091971 |
| O    | 9.893770919539  | -2.649361047805 | 12.683717815897 |
| O    | 3.655481859142  | 2.704101770625  | 6.252800737913  |
| O    | 2.278692757104  | 2.893927032522  | 12.578878782923 |
| O    | 9.933688149062  | 2.697356353032  | 12.729644744745 |
| N    | 0.119435017873  | -2.574228452552 | 19.649840334188 |
| O    | 0.211880065883  | -1.248387413928 | 21.283853067115 |
| N    | 0.037276747937  | 0.119670187963  | 16.720632513955 |
| O    | 0.125253791474  | 1.950291228321  | 17.900281017109 |

SCF-energies:

SVP -50496.18438411

TZVPP -50508.23045700

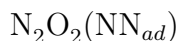

| Atom | x               | y               | z               |
|------|-----------------|-----------------|-----------------|
| O    | -6.204010204492 | 0.004832450307  | 9.980874071246  |
| O    | -5.964316765801 | -0.011901572780 | 14.769203619254 |
| O    | 0.000524715110  | -5.689628554718 | 8.589743130604  |
| O    | 0.001649955276  | 0.015217933658  | 3.506895196018  |
| O    | -0.013221188115 | 0.026745254350  | 8.619591588170  |
| O    | 6.144763663543  | 0.029867154855  | 9.981270001063  |
| O    | 5.907134398158  | 0.001741499077  | 14.790741333854 |
| O    | 0.015350900694  | 5.671543148911  | 8.576090378489  |
| TI   | -6.427483620186 | -2.808763310996 | 12.842552909819 |
| TI   | -6.419240071843 | 2.814177753942  | 12.870318623645 |
| TI   | -6.098121197026 | 0.014389499301  | 6.619752769307  |
| TI   | 0.008876795819  | -5.489407456627 | 12.256851824402 |
| TI   | -0.006294049892 | -2.865458947996 | 6.342971351593  |
| TI   | -0.150356019806 | 0.087694187058  | 12.243843676324 |
| TI   | 0.036785599513  | 2.719056292710  | 6.145254696248  |
| TI   | 6.415905251714  | 2.807493906749  | 12.871187056731 |
| TI   | 6.125177514668  | -0.016185827105 | 6.632973256295  |
| TI   | 0.072299244119  | 5.553648508730  | 12.058837915445 |
| O    | -3.648702900980 | -2.696923581477 | 6.280619104290  |
| O    | -9.954787852623 | -2.683140433648 | 12.729596313533 |
| O    | -2.332822892108 | -2.826399584075 | 12.498612995996 |
| O    | -3.664673669614 | 2.701151976732  | 6.259749482333  |
| O    | -9.951373476780 | 2.680061906367  | 12.736891975271 |
| O    | -2.315075451022 | 2.856363365543  | 12.580679708709 |
| O    | 3.655672946258  | -2.689991929128 | 6.283634325377  |
| O    | 2.297310588413  | -2.854578058111 | 12.526468611243 |
| O    | 9.893869233008  | -2.646850954911 | 12.677573064718 |
| O    | 3.642713298035  | 2.704440806137  | 6.243601680728  |
| O    | 2.263235480778  | 2.873791944473  | 12.600808466661 |
| O    | 9.934093947681  | 2.698996208776  | 12.736498804681 |
| N    | -0.040400938048 | -0.971205725879 | 16.672213761962 |
| O    | -0.007871880532 | -0.295333710878 | 18.715840263665 |
| N    | -0.024476097481 | -4.616137699997 | 16.729134007056 |
| O    | -0.000914986501 | -5.223912412067 | 18.785466591321 |

SCF-energies:

SVP -50496.18223573

TZVPP -50508.22571953

N<sub>2</sub>O<sub>2</sub>(rec)

| Atom | x               | y               | z               |
|------|-----------------|-----------------|-----------------|
| O    | -6.187729930803 | -0.004603038203 | 9.986744225754  |
| O    | -5.970024124554 | 0.001078781269  | 14.776854172625 |
| O    | 0.008769823496  | -5.668143610616 | 8.577792778837  |
| O    | 0.001122099340  | -0.002414345178 | 3.517099827184  |
| O    | -0.007892651979 | 0.003549185401  | 8.593073577104  |
| O    | 6.140117844930  | 0.015805518032  | 9.982652357661  |
| O    | 5.912105651996  | 0.010223922892  | 14.789081534835 |
| O    | 0.016101015335  | 5.665697975641  | 8.573832848596  |
| TI   | -6.419341730156 | -2.809985409881 | 12.862452441937 |
| TI   | -6.413484755076 | 2.818430969776  | 12.858814238661 |
| TI   | -6.094759170361 | 0.014765765705  | 6.623365601563  |
| TI   | 0.040157327603  | -5.528466342204 | 12.071617398291 |
| TI   | -0.007554826643 | -2.735263845445 | 6.246210608522  |
| TI   | -0.208467459764 | 0.005638432951  | 12.438509739428 |
| TI   | 0.037272859918  | 2.755160891609  | 6.255763213131  |
| TI   | 6.406592836184  | 2.808469235289  | 12.854650801979 |
| TI   | 6.118833660790  | -0.015117251611 | 6.629871732172  |
| TI   | 0.098039620488  | 5.517384809911  | 12.087574192092 |
| O    | -3.657118418397 | -2.706338281813 | 6.261971100983  |
| O    | -9.954370543496 | -2.682739857439 | 12.737491639893 |
| O    | -2.321139603015 | -2.873024756901 | 12.598649286992 |
| O    | -3.673480225077 | 2.700965767800  | 6.264725003939  |
| O    | -9.951749635042 | 2.680940548948  | 12.731797831818 |
| O    | -2.315427959868 | 2.859555669386  | 12.606507736131 |
| O    | 3.668313628245  | -2.700293263031 | 6.260949545936  |
| O    | 2.272255833258  | -2.903623174609 | 12.613361368493 |
| O    | 9.895220000714  | -2.649304107895 | 12.685497270351 |
| O    | 3.655302494402  | 2.705578951227  | 6.246447453255  |
| O    | 2.281397799169  | 2.896624936029  | 12.583296374362 |
| O    | 9.935110479785  | 2.698395168955  | 12.731116144267 |
| N    | 0.051868138938  | 0.053562417339  | 16.724192300494 |
| O    | 0.190497672792  | 1.919126761436  | 17.857220627399 |
| N    | 0.303940375798  | 0.204991833356  | 21.723845695339 |
| O    | 0.179591439158  | -1.730173146688 | 20.939845004640 |

SCF-energies:

SVP -50496.17758476

TZVPP -50508.22284113

$N_2O(N_{ad})$

| Atom | x               | y               | z               |
|------|-----------------|-----------------|-----------------|
| O    | -6.195663702015 | 0.002962421899  | 9.978817910443  |
| O    | -5.963262577062 | 0.001803220050  | 14.769790335030 |
| O    | 0.014878179047  | -5.674227787431 | 8.571657725320  |
| O    | 0.001554238593  | -0.001519628994 | 3.524322734205  |
| O    | -0.026513149331 | 0.007222624810  | 8.655794376520  |
| O    | 6.132876204587  | 0.020947388169  | 9.970953228571  |
| O    | 5.938620020209  | 0.008990359879  | 14.776472803293 |
| O    | 0.021181967985  | 5.670207777983  | 8.569324121596  |
| TI   | -6.421733616733 | -2.817061514696 | 12.862493795925 |
| TI   | -6.426665218345 | 2.819944618703  | 12.858496290125 |
| TI   | -6.100099695212 | 0.012160127459  | 6.623491594829  |
| TI   | 0.066218273563  | -5.527509704397 | 12.084533759133 |
| TI   | 0.002070037461  | -2.768952815845 | 6.245783106444  |
| TI   | -0.249035784112 | 0.018398025635  | 12.340694827502 |
| TI   | 0.036613742691  | 2.764905548096  | 6.235135669023  |
| TI   | 6.413340395628  | 2.806395858215  | 12.868933036028 |
| TI   | 6.135835630334  | -0.011794927942 | 6.632542868183  |
| TI   | 0.124955255827  | 5.528728573933  | 12.077613003599 |
| O    | -3.645609503874 | -2.701867113089 | 6.265728520887  |
| O    | -9.951385967830 | -2.679811572229 | 12.731660392135 |
| O    | -2.326605656364 | -2.856662987178 | 12.522007579365 |
| O    | -3.660524713454 | 2.700593750338  | 6.264466756142  |
| O    | -9.952523310668 | 2.682231588015  | 12.733564981347 |
| O    | -2.315665752363 | 2.849932802143  | 12.583281742685 |
| O    | 3.646527633602  | -2.692481640491 | 6.263347740188  |
| O    | 2.266848758777  | -2.899002523396 | 12.582979860564 |
| O    | 9.892291847449  | -2.647377977150 | 12.667394193165 |
| O    | 3.636633103999  | 2.700176284178  | 6.247519603261  |
| O    | 2.269854480446  | 2.894971711383  | 12.589404857574 |
| O    | 9.935730881864  | 2.700902832986  | 12.722495708513 |
| N    | -1.263411058015 | 0.991237351068  | 18.192778324563 |
| O    | -1.503953592270 | 0.780479572503  | 20.371728041488 |
| O    | -0.137947530110 | -0.264298578743 | 16.614728705507 |

SCF-energies:

SVP -50421.13973781

TZVPP -50433.09406376



N<sub>2</sub>O(O<sub>ad</sub>)

| Atom | x               | y               | z               |
|------|-----------------|-----------------|-----------------|
| O    | -6.196852794811 | -0.003022838885 | 9.971056046809  |
| O    | -5.994835489231 | 0.001143446359  | 14.761113746293 |
| O    | 0.010906610783  | -5.672078259736 | 8.572018500150  |
| O    | 0.001418412833  | -0.001331530841 | 3.527514518012  |
| O    | -0.013000508304 | 0.000143724046  | 8.670366830767  |
| O    | 6.134967767079  | 0.019715750832  | 9.979071735173  |
| O    | 5.899103336086  | 0.013055046399  | 14.783237388105 |
| O    | 0.021438440633  | 5.673037496850  | 8.570744489497  |
| TI   | -6.424149950905 | -2.815359802074 | 12.872150914927 |
| TI   | -6.424285120320 | 2.819916464919  | 12.870869190025 |
| TI   | -6.117295937200 | 0.011721566365  | 6.628266718908  |
| TI   | 0.053162321817  | -5.527790166302 | 12.080224988839 |
| TI   | -0.013427236827 | -2.764056697440 | 6.242688468669  |
| TI   | -0.234514161193 | 0.023183590776  | 12.354258947992 |
| TI   | 0.020309115605  | 2.769359056018  | 6.245706982641  |
| TI   | 6.413829662924  | 2.811603937085  | 12.853914773430 |
| TI   | 6.118886902954  | -0.012575240607 | 6.630498707714  |
| TI   | 0.107035220884  | 5.527893446197  | 12.084259691078 |
| O    | -3.639608073111 | -2.701300680485 | 6.263875405760  |
| O    | -9.954883889886 | -2.683275504380 | 12.726291246431 |
| O    | -2.317147567729 | -2.842911707352 | 12.545641774820 |
| O    | -3.651483944916 | 2.698313466760  | 6.267510056906  |
| O    | -9.954540025179 | 2.683424924503  | 12.723888565185 |
| O    | -2.319644952521 | 2.839869898128  | 12.541051654567 |
| O    | 3.652989029164  | -2.694247807254 | 6.263612708199  |
| O    | 2.276075086573  | -2.919480765390 | 12.601938211490 |
| O    | 9.889835706580  | -2.644501376878 | 12.679428245284 |
| O    | 3.640849167015  | 2.700717276272  | 6.252197680753  |
| O    | 2.274379124318  | 2.907155521867  | 12.593651005617 |
| O    | 9.932191557567  | 2.699174964449  | 12.729341531695 |
| O    | -0.112420352322 | 0.001715193384  | 16.643858927506 |
| N    | 1.438844641580  | 0.022869010218  | 18.311728007707 |
| N    | 2.802493429472  | 0.039599590517  | 19.927905970417 |

SCF-energies:

SVP -50421.13973781

TZVPP -50433.09157916

NO<sub>2</sub>(O<sub>ad</sub>)

| Atom | x               | y               | z               |
|------|-----------------|-----------------|-----------------|
| O    | -6.195663702015 | 0.002962421899  | 9.978817910443  |
| O    | -5.963262577062 | 0.001803220050  | 14.769790335030 |
| O    | 0.014878179047  | -5.674227787431 | 8.571657725320  |
| O    | 0.001554238593  | -0.001519628994 | 3.524322734205  |
| O    | -0.026513149331 | 0.007222624810  | 8.655794376520  |
| O    | 6.132876204587  | 0.020947388169  | 9.970953228571  |
| O    | 5.938620020209  | 0.008990359879  | 14.776472803293 |
| O    | 0.021181967985  | 5.670207777983  | 8.569324121596  |
| TI   | -6.421733616733 | -2.817061514696 | 12.862493795925 |
| TI   | -6.426665218345 | 2.819944618703  | 12.858496290125 |
| TI   | -6.100099695212 | 0.012160127459  | 6.623491594829  |
| TI   | 0.066218273563  | -5.527509704397 | 12.084533759133 |
| TI   | 0.002070037461  | -2.768952815845 | 6.245783106444  |
| TI   | -0.249035784112 | 0.018398025635  | 12.340694827502 |
| TI   | 0.036613742691  | 2.764905548096  | 6.235135669023  |
| TI   | 6.413340395628  | 2.806395858215  | 12.868933036028 |
| TI   | 6.135835630334  | -0.011794927942 | 6.632542868183  |
| TI   | 0.124955255827  | 5.528728573933  | 12.077613003599 |
| O    | -3.645609503874 | -2.701867113089 | 6.265728520887  |
| O    | -9.951385967830 | -2.679811572229 | 12.731660392135 |
| O    | -2.326605656364 | -2.856662987178 | 12.522007579365 |
| O    | -3.660524713454 | 2.700593750338  | 6.264466756142  |
| O    | -9.952523310668 | 2.682231588015  | 12.733564981347 |
| O    | -2.315665752363 | 2.849932802143  | 12.583281742685 |
| O    | 3.646527633602  | -2.692481640491 | 6.263347740188  |
| O    | 2.266848758777  | -2.899002523396 | 12.582979860564 |
| O    | 9.892291847449  | -2.647377977150 | 12.667394193165 |
| O    | 3.636633103999  | 2.700176284178  | 6.247519603261  |
| O    | 2.269854480446  | 2.894971711383  | 12.589404857574 |
| O    | 9.935730881864  | 2.700902832986  | 12.722495708513 |
| N    | -1.263411058015 | 0.991237351068  | 18.192778324563 |
| O    | -1.503953592270 | 0.780479572503  | 20.371728041488 |
| O    | -0.137947530110 | -0.264298578743 | 16.614728705507 |

SCF-energies:

SVP -50441.53375431

TZVPP -50453.51256224

NO<sub>2</sub>(OO<sub>ad</sub>)

| Atom | x               | y               | z               |
|------|-----------------|-----------------|-----------------|
| O    | -6.193120703471 | -0.000746977212 | 9.972556957439  |
| O    | -5.984806869239 | -0.010160624567 | 14.765400516837 |
| O    | 0.007181794933  | -5.675712729677 | 8.587445032785  |
| O    | 0.001260492908  | 0.001071978335  | 3.514618897964  |
| O    | -0.022340255377 | 0.006554574743  | 8.642375329174  |
| O    | 6.132816907247  | 0.022208864455  | 9.973624000053  |
| O    | 5.928935020788  | 0.000557679943  | 14.784852453456 |
| O    | 0.019488682154  | 5.671323770670  | 8.576444230616  |
| TI   | -6.428565320313 | -2.815747925923 | 12.856749041059 |
| TI   | -6.419280276312 | 2.817085395540  | 12.876568096367 |
| TI   | -6.109532414379 | 0.011317031909  | 6.624392811053  |
| TI   | 0.042999551288  | -5.517295426103 | 12.140897935115 |
| TI   | -0.002438876700 | -2.803403784295 | 6.248438008441  |
| TI   | -0.209370309862 | 0.045071015008  | 12.232737082387 |
| TI   | 0.027437459822  | 2.774243238231  | 6.203516441764  |
| TI   | 6.412027089990  | 2.806883126583  | 12.877470623535 |
| TI   | 6.131667917309  | -0.010324861483 | 6.634152586032  |
| TI   | 0.102184030411  | 5.532410825724  | 12.094359771147 |
| O    | -3.640135465218 | -2.699919064653 | 6.263908132469  |
| O    | -9.955236638190 | -2.683888429961 | 12.724881163174 |
| O    | -2.321605879921 | -2.836120662934 | 12.540565211854 |
| O    | -3.651713273946 | 2.698333277894  | 6.260431189384  |
| O    | -9.951056443959 | 2.680379610598  | 12.727352061553 |
| O    | -2.317413442753 | 2.843110714262  | 12.562963717037 |
| O    | 3.642914190225  | -2.691781437072 | 6.265069000170  |
| O    | 2.276819868408  | -2.880119267376 | 12.570774938633 |
| O    | 9.892338771942  | -2.646944745314 | 12.669664519892 |
| O    | 3.633465020366  | 2.698361243531  | 6.246187804418  |
| O    | 2.263919441343  | 2.876783996002  | 12.590981062174 |
| O    | 9.932603195553  | 2.698942618011  | 12.726567389751 |
| N    | -0.073905080887 | -2.326548097025 | 17.866621595633 |
| O    | -0.070697505683 | -4.473036273361 | 17.252060851993 |
| O    | -0.076488685558 | -0.362672859267 | 16.738223951568 |

SCF-energies:

SVP -50441.53296841

TZVPP -50453.51032511

TS1

| Atom | x               | y               | z               |
|------|-----------------|-----------------|-----------------|
| O    | -6.187126232801 | -0.009907312301 | 9.977978671813  |
| O    | -5.990805271497 | 0.006011035698  | 14.766739725634 |
| O    | 0.001596234016  | -5.670103581990 | 8.570428767328  |
| O    | 0.001977556918  | 0.000244906264  | 3.526556556991  |
| O    | -0.021287483540 | -0.000313978838 | 8.649970404167  |
| O    | 6.132696320302  | 0.027518814359  | 9.979563528471  |
| O    | 5.923206708149  | 0.004931767498  | 14.786878391687 |
| O    | 0.029784051070  | 5.671947263538  | 8.572716562835  |
| TI   | -6.425940305494 | -2.814525660967 | 12.871213259372 |
| TI   | -6.427388092937 | 2.820022783820  | 12.862393517157 |
| TI   | -6.104924211175 | 0.004684593302  | 6.625190517237  |
| TI   | 0.080706187491  | -5.531628608421 | 12.075815593067 |
| TI   | 0.005060275081  | -2.760370128145 | 6.248706447091  |
| TI   | -0.254277413636 | 0.038829873443  | 12.379358939787 |
| TI   | 0.020653496243  | 2.757269976567  | 6.242304379417  |
| TI   | 6.413900880580  | 2.805472091371  | 12.869312019723 |
| TI   | 6.126459049990  | -0.005860067339 | 6.634006201107  |
| TI   | 0.107067721653  | 5.540531094858  | 12.076005704379 |
| O    | -3.650262812494 | -2.701528905828 | 6.261738448131  |
| O    | -9.953984575864 | -2.682431296273 | 12.733155477565 |
| O    | -2.295771069786 | -2.844837927203 | 12.645632193267 |
| O    | -3.654405748421 | 2.702274485307  | 6.266468119977  |
| O    | -9.955218237962 | 2.683225234158  | 12.723288525622 |
| O    | -2.333968828646 | 2.860170887293  | 12.518981157221 |
| O    | 3.650096594309  | -2.695396181116 | 6.263653955330  |
| O    | 2.292195991936  | -2.929404761349 | 12.545280556161 |
| O    | 9.893557556967  | -2.646336151444 | 12.671706210080 |
| O    | 3.644567454409  | 2.700047146210  | 6.251037050593  |
| O    | 2.250110805433  | 2.898423261144  | 12.651017623969 |
| O    | 9.933408936270  | 2.700364903868  | 12.732790984430 |
| N    | -0.010641562171 | -0.016679095955 | 16.648013248709 |
| O    | 0.984034374117  | 1.485654913656  | 18.433391117610 |
| N    | 0.631204818308  | -0.268824131884 | 20.196262510347 |
| O    | -0.341951843423 | -1.783524880536 | 18.440174372185 |

SCF-energies:

SVP -50496.09174532

TS2

| Atom | x               | y               | z               |
|------|-----------------|-----------------|-----------------|
| O    | -6.200637334439 | -0.003054820903 | 9.972967724182  |
| O    | -5.965605006028 | 0.001323746231  | 14.756166132975 |
| O    | 0.011912053506  | -5.671227543701 | 8.574536822727  |
| O    | 0.001511524108  | -0.001099569637 | 3.527809345730  |
| O    | -0.020163295411 | -0.000359106493 | 8.655486119702  |
| O    | 6.136483404063  | 0.019742682938  | 9.973655389330  |
| O    | 5.919031028967  | 0.010768746531  | 14.775017832351 |
| O    | 0.022887938870  | 5.672008860212  | 8.574474461140  |
| TI   | -6.426558092662 | -2.817018858804 | 12.860352809131 |
| TI   | -6.427183274153 | 2.821731166219  | 12.859033258577 |
| TI   | -6.104782254806 | 0.011291234176  | 6.622189527768  |
| TI   | 0.062600142965  | -5.528813447382 | 12.077121474406 |
| TI   | -0.002974250371 | -2.756288587975 | 6.246528739053  |
| TI   | -0.244901216420 | 0.023822677681  | 12.386254492448 |
| TI   | 0.030378262961  | 2.761995753233  | 6.250220166050  |
| TI   | 6.415155548214  | 2.809651654683  | 12.861248036725 |
| TI   | 6.128112800819  | -0.012217182819 | 6.630832851249  |
| TI   | 0.116768146543  | 5.528612960199  | 12.082733882271 |
| O    | -3.646758057552 | -2.703997319375 | 6.263393308617  |
| O    | -9.954229617224 | -2.681845761963 | 12.732571937308 |
| O    | -2.321222323167 | -2.849734892888 | 12.559712015389 |
| O    | -3.658576286223 | 2.701195216658  | 6.267442901578  |
| O    | -9.954028120276 | 2.682165097552  | 12.730449053210 |
| O    | -2.324156366934 | 2.846253126839  | 12.552275783758 |
| O    | 3.652176692005  | -2.695523666664 | 6.262496164779  |
| O    | 2.271880189980  | -2.906994707796 | 12.599206895393 |
| O    | 9.891873182789  | -2.646526892561 | 12.674123834988 |
| O    | 3.640518134984  | 2.701665765580  | 6.251105842838  |
| O    | 2.269943692127  | 2.892593768041  | 12.593485299734 |
| O    | 9.934970906146  | 2.700482232011  | 12.726982987911 |
| N    | -0.091325410055 | 0.011084390077  | 16.763695096054 |
| O    | 1.714013808870  | -0.017387794453 | 18.557490934257 |
| O    | -1.815086018192 | -0.048194638383 | 18.636026280529 |
| N    | -0.010748426338 | -0.072602191956 | 20.378751805710 |

SCF-energies:

SVP -50496.09054328

TS3

| Atom | x               | y               | z               |
|------|-----------------|-----------------|-----------------|
| O    | -6.194732264282 | -0.001308818198 | 9.972866185461  |
| O    | -5.993771072414 | 0.001340075013  | 14.764357671698 |
| O    | 0.007430427966  | -5.674155768323 | 8.577525150303  |
| O    | 0.001586081930  | 0.000902066530  | 3.523573579466  |
| O    | -0.008061399600 | 0.004513316703  | 8.644002730404  |
| O    | 6.132853956741  | 0.024915598654  | 9.983270039559  |
| O    | 5.896256083456  | 0.004175582997  | 14.790516860139 |
| O    | 0.025251848557  | 5.672692497990  | 8.573893946719  |
| TI   | -6.421480409585 | -2.816638091961 | 12.873783129407 |
| TI   | -6.424264881389 | 2.818236175324  | 12.872972573612 |
| TI   | -6.117149035849 | 0.003758422114  | 6.628581583168  |
| TI   | 0.050896310607  | -5.519937825653 | 12.106169164315 |
| TI   | -0.001513833260 | -2.781832053640 | 6.251390332892  |
| TI   | -0.218512926262 | 0.041795582087  | 12.308780142723 |
| TI   | 0.010120178580  | 2.761933174350  | 6.222676453356  |
| TI   | 6.412776296396  | 2.808287173181  | 12.866838380922 |
| TI   | 6.119639634092  | -0.003923461675 | 6.632807760299  |
| TI   | 0.092270956349  | 5.537729282030  | 12.082020683249 |
| O    | -3.644720870114 | -2.699308547506 | 6.268759300925  |
| O    | -9.953628399756 | -2.683004517626 | 12.723830277803 |
| O    | -2.311632817754 | -2.836473328993 | 12.553706917730 |
| O    | -3.648017368626 | 2.701271745657  | 6.267454669408  |
| O    | -9.954947270934 | 2.684121531489  | 12.723033007205 |
| O    | -2.325897812248 | 2.850421651287  | 12.530355211968 |
| O    | 3.650546141085  | -2.695160385196 | 6.267070244387  |
| O    | 2.285315533078  | -2.910832533236 | 12.562736554322 |
| O    | 9.891276449689  | -2.644033352555 | 12.677896625694 |
| O    | 3.647929671736  | 2.701268828890  | 6.252164287441  |
| O    | 2.258013747431  | 2.892533354758  | 12.627858029799 |
| O    | 9.930616749761  | 2.698659805609  | 12.733960736943 |
| N    | -0.031775348673 | -0.235503873339 | 16.727222482184 |
| O    | -0.085067068091 | -3.043644902741 | 17.977726018093 |
| N    | 1.439804310635  | -0.984151515974 | 18.429372739425 |
| O    | 3.082991224069  | -0.522118639790 | 19.811312847247 |

SCF-energies:

SVP -50496.09252249
